# Supplementary material for: Enzymatic preparation of phytosterol esters with fatty acids from high-oleic sunflower seed oil using response surface methodology
Source: Royal Society of Chemistry journal article supplement (doi:10.1039/d1ra01486b), 2021-01-01
Supplement: d1ra01486b1.pdf [file d1ra01486b1.pdf]

## Supplementary Information

### *Enzymatic preparation of phytosterol esters with fatty acids from high-oleic sunflower seed oil using response surface methodology*

Xiaoping Wang, Bing Xiao, Guolong Yang, Jingnan Chen, Wei Liu\*

College of Food Science and Technology, Henan University of Technology, Lianhua  
Street 100, Zhengzhou 450001, Henan Province, P. R. China

**Table S1. Experimental design and results of the conversion of phytosterols  
affected by the reaction temperature, molar ratio of substrates, and enzyme  
loading.**

| <b>Trial</b> | <b>X<sub>1</sub> Temperature<br/>(°C)</b> | <b>X<sub>2</sub> substrate molar<br/>ratio</b> | <b>X<sub>3</sub> Enzyme<br/>loading (%)</b> | <b>Conversion<br/>(%)</b> |
|--------------|-------------------------------------------|------------------------------------------------|---------------------------------------------|---------------------------|
| 1            | 40 (0)                                    | 1:3 (1)                                        | 8 (1)                                       | 94.4                      |
| 2            | 50 (1)                                    | 1:2 (0)                                        | 8 (1)                                       | 95.1                      |
| 3            | 40 (0)                                    | 1:2 (0)                                        | 6 (0)                                       | 94.0                      |
| 4            | 40 (0)                                    | 1:3 (1)                                        | 4 (-1)                                      | 91.5                      |
| 5            | 50 (1)                                    | 1:1 (-1)                                       | 6 (0)                                       | 90.6                      |
| 6            | 30 (-1)                                   | 1:1 (-1)                                       | 6 (0)                                       | 72.6                      |

---

|    |         |          |        |      |
|----|---------|----------|--------|------|
| 7  | 40 (0)  | 1:2 (0)  | 6 (0)  | 94.9 |
| 8  | 40 (0)  | 1:2 (0)  | 6 (0)  | 94.8 |
| 9  | 30 (-1) | 1:3 (1)  | 6 (0)  | 92.9 |
| 10 | 40 (0)  | 1:1 (-1) | 4 (-1) | 76.4 |
| 11 | 30 (-1) | 1:2 (0)  | 8 (1)  | 92.7 |
| 12 | 40 (0)  | 1:1 (-1) | 8 (1)  | 84.9 |
| 13 | 50 (1)  | 1:3 (1)  | 6 (0)  | 96.5 |
| 14 | 40 (0)  | 1:2 (0)  | 6 (0)  | 94.0 |
| 15 | 40 (0)  | 1:2 (0)  | 6 (0)  | 94.6 |
| 16 | 50 (1)  | 1:2 (0)  | 4 (-1) | 95.6 |
| 17 | 30 (-1) | 1:2 (0)  | 4 (-1) | 80.9 |

---
